# Supplementary material for: Development of Genomic Resources for Pacific Herring through Targeted Transcriptome Pyrosequencing
Source: PLoS One. 2012 Feb 27;7(2):e30908. doi: 10.1371/journal.pone.0030908 (PMC3288011; doi:10.1371/journal.pone.0030908)
Supplement: Table S1 — Description of select contig sequences. Description is based on BlastX analysis using the Swiss-Prot database. E-values and organism associated with BlastX hits are provided as are the number of unique reads that map to each contig. (XLS) [file pone.0030908.s001.xls]

## Sheet: Supp table
Category	Description	Lowest E-value	Sum Unique Reads	Organism
Growth	Growth hormone receptor	7.33102e-37	68	Ailuropoda melanoleuca
	Hepatocyte growth factor receptor	1.80276e-177	47	Otolemur garnettii
	Insulin-like growth factor I	1.10909e-65	24	Cyprinus carpio
	Insulin-like growth factor II	1.01437e-96	87	Oncorhynchus mykiss
	Insulin-like growth factor-binding protein 1	5.09984e-25	56	Mus musculus
	Insulin-like growth factor-binding protein 2-A	4.82334e-123	46	Danio rerio
	Insulin-like growth factor-binding protein 5	6.89824e-77	11	Mus musculus
	Somatostatin receptor type 2	1.29635e-105	23	Sus scrofa
Metabolic Processes	Cytochrome P450 1A1	0	187	Oncorhynchus mykiss
	Cytochrome P450 2C16	4.12936e-22	54	Oryctolagus cuniculus
	Cytochrome P450 2C20	1.21438e-37	26	Macaca fascicularis
	Cytochrome P450 2C3	3.40929e-52	92	Oryctolagus cuniculus
	Cytochrome P450 2D9	1.6502e-23	29	Mus musculus
	Cytochrome P450 2F1	8.35327e-36	36	Homo sapiens
	Cytochrome P450 2J2	2.6872e-69	14	Homo sapiens
	Cytochrome P450 2J6	1.91201e-47	17	Mus musculus
	Cytochrome P450 2K1	1.09483e-97	12	Oncorhynchus mykiss
	Cytochrome P450 3A24	1.42918e-52	14	Ovis aries
	Cytochrome P450 4A12A	3.59577e-37	18	Mus musculus
	Cytochrome P450 4B1	5.65695e-32	71	Oryctolagus cuniculus
	Cytochrome P450 4V2	7.08604e-149	126	Homo sapiens
Protease / Protease inhibitor	Chymotrypsin-C	5.68464e-78	10	Bos taurus
	Metalloproteinase inhibitor 2	3.24417e-33	27	Rattus norvegicus
	Metalloproteinase inhibitor 4	3.56261e-32	13	Mus musculus
Steroid Metabolism	Cholesterol 24-hydroxylase	1.73806e-52	21	Homo sapiens
	Estrogen receptor beta-1	1.70594e-174	79	Carassius auratus
	Peroxisome proliferator-activated receptor delta	5.19297e-180	79	Homo sapiens
	StAR-related lipid transfer protein 13	0	32	Homo sapiens
	Type III iodothyronine deiodinase	3.33319e-102	50	Sparus aurata
Immune Response	Aryl hydrocarbon receptor	1.03652e-49	15	Homo sapiens
	C-type lectin domain family 10 member A	3.32741e-28	42	Homo sapiens
	Cathepsin E	2.64947e-97	72	Rana catesbeiana
	Class I histocompatibility antigen	2.69745e-37	17	Gallus gallus
	Complement C2	3.06905e-63	188	Bos taurus
	Complement C3 (Fragment)	1.70224e-93	15	Oncorhynchus mykiss
	Complement C5	1.85213e-164	259	Homo sapiens
	Complement component C6	8.82025e-122	23	Pongo pygmaeus
	Complement component C7	5.37737e-61	187	Bos taurus
	Complement component C8 beta chain	6.07798e-21	69	Oncorhynchus mykiss
	Complement component C8 gamma chain	2.41941e-32	93	Homo sapiens
	Complement factor B	1.62745e-21	18	Pongo pygmaeus
	Complement factor B	3.32421e-27	49	Bos taurus
	Complement factor H	4.077e-55	168	Bos taurus
	Complement factor I	6.71076e-106	393	Mus musculus
	Heat shock 70 kDa protein 12A	8.80815e-40	25	Mus musculus
	Interleukin-31 receptor A	1.63442e-27	68	Homo sapiens
	Macrophage-stimulating protein receptor	3.60641e-40	19	Mus musculus
	Multidrug and toxin extrusion protein 1	2.06513e-54	12	Danio rerio
	Multidrug resistance-associated protein 9	0	52	Mus musculus
	Selenoprotein Pb	1.52071e-73	455	Danio rerio
Other	Insulin receptor	2.66514e-121	14	Homo sapiens
	Prostaglandin E synthase 3	1.57734e-62	11	Pongo abelii
	Steroidogenic factor 1	1.15374e-43	17	Macropus eugenii
	TGF-beta receptor type-1	1.45664e-175	19	Rattus norvegicus
	Vitellogenin	7.76844e-83	153	Oncorhynchus mykiss
